# Supplementary material for: IRF8-driven reprogramming of the immune microenvironment enhances anti-tumor adaptive immunity and reduces immunosuppression in murine glioblastoma
Source: PubMed Central journal article supplement — bioRxiv. 2024 Apr 3:2024.04.02.587608. Preprint. [Version 1] doi: 10.1101/2024.04.02.587608 (PMC11014587; doi:10.1101/2024.04.02.587608), 2024-04-03
Supplement: NIHPP2024.04.02.587608v1-supplement-1.pdf [file NIHPP2024.04.02.587608v1-supplement-1.pdf]

# SUPPLEMENTARY FIGURE 1

**A**

bioRxiv preprint doi: <https://doi.org/10.1101/2024.04.03.7608>; this version posted April 3, 2024. The copyright holder for this preprint (which was not certified by peer review) is the author/funder, who has granted bioRxiv a license to display the preprint in perpetuity. It is made available under aCC-BY-NC-ND 4.0 International license.

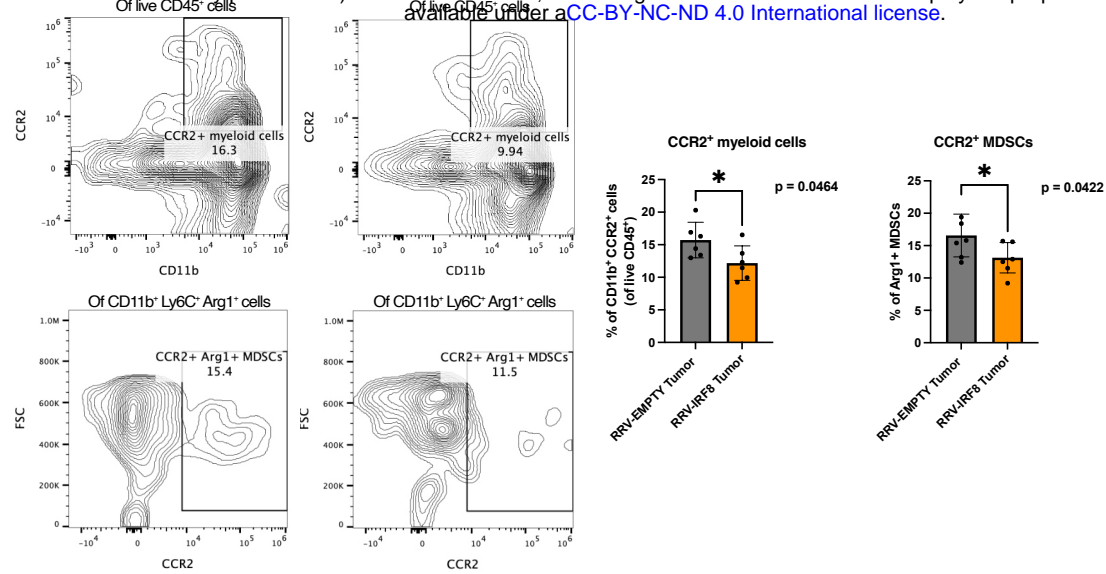

**B**

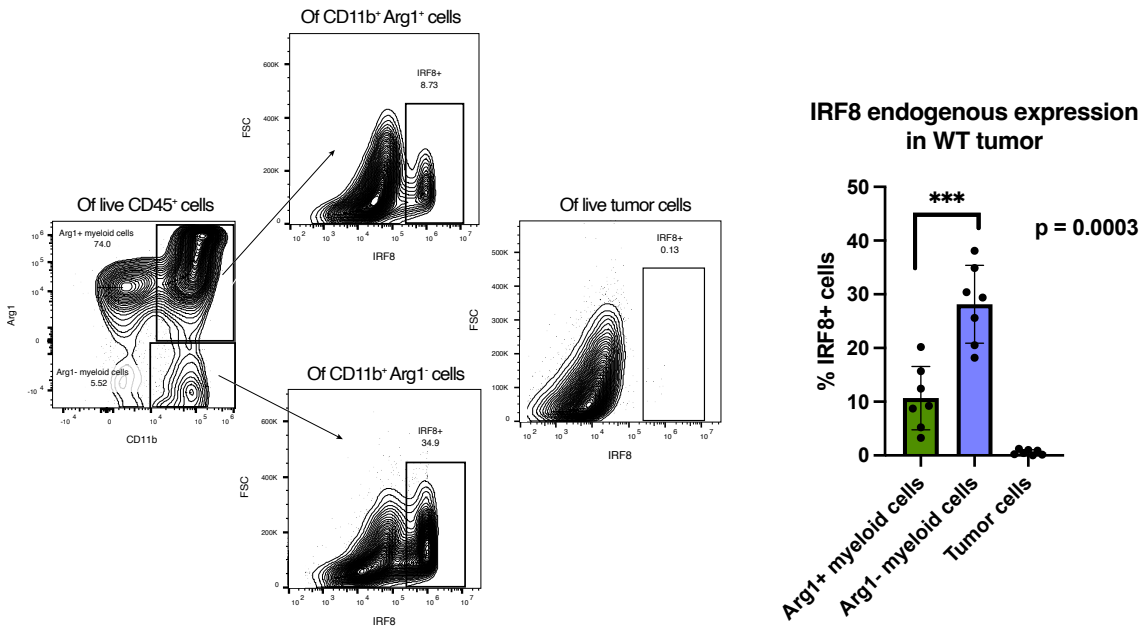

**C**

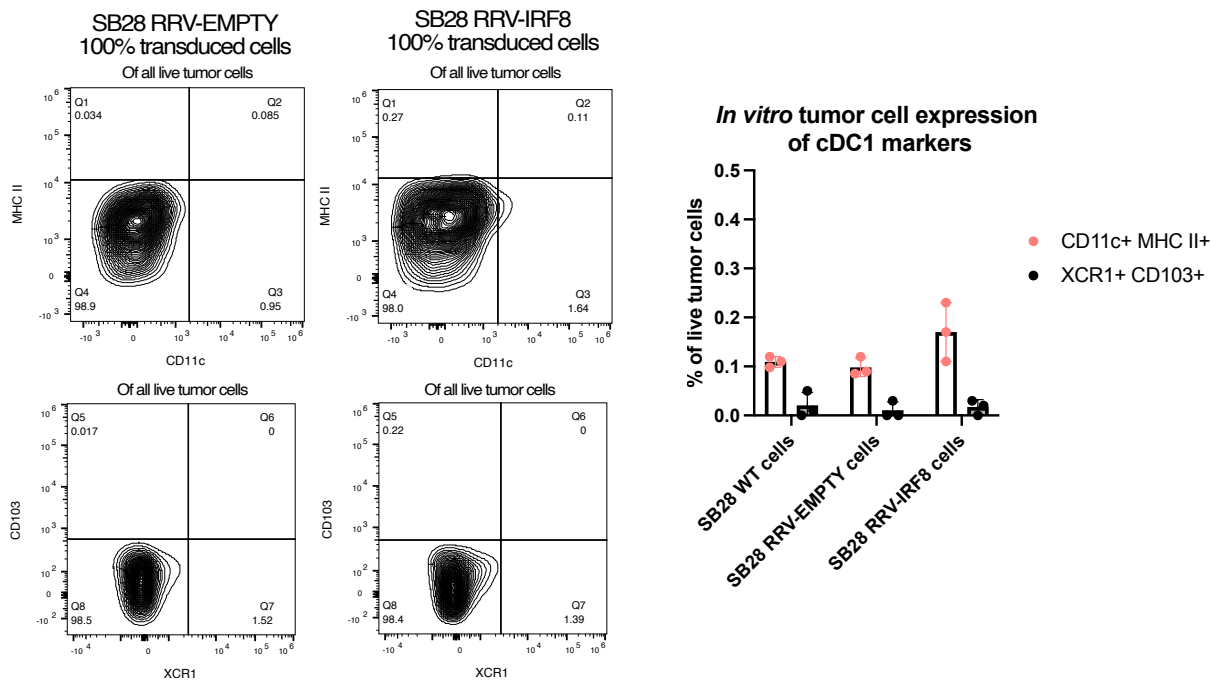

**Supplementary Figure 1. (A)** CCR2 expression in myeloid (CD11b+) cells and M-MDSCs (Ly6C+ Arg1+) from intracerebral SB28 RRV-EMPTY or RRV-IRF8 tumors. Bars represent the mean of 6 biological replicates **(B)** Endogenous IRF8 expression in CD11b+ Arg1+, CD11b+ Arg1-, and tumor cells in intracerebral SB28 WT tumors. Bars represent the mean of 6 biological replicates. **(C)** *In vitro* expression of cDC1-associated markers in SB28 WT, SB28 RRV-EMPTY 100% transduced, and SB28 RRV-IRF8 100% transduced cell lines. Bars represent the mean of 3 technical replicates.

# SUPPLEMENTARY FIGURE 2

**A** bioRxiv preprint doi: <https://doi.org/10.1101/2024.04.02.587608>; this version posted April 3, 2024. The copyright holder for this preprint (which was not certified by peer review) is the author/funder, who has granted bioRxiv a license to display the preprint in perpetuity. It is made available under aCC-BY-NC-ND 4.0 International license.

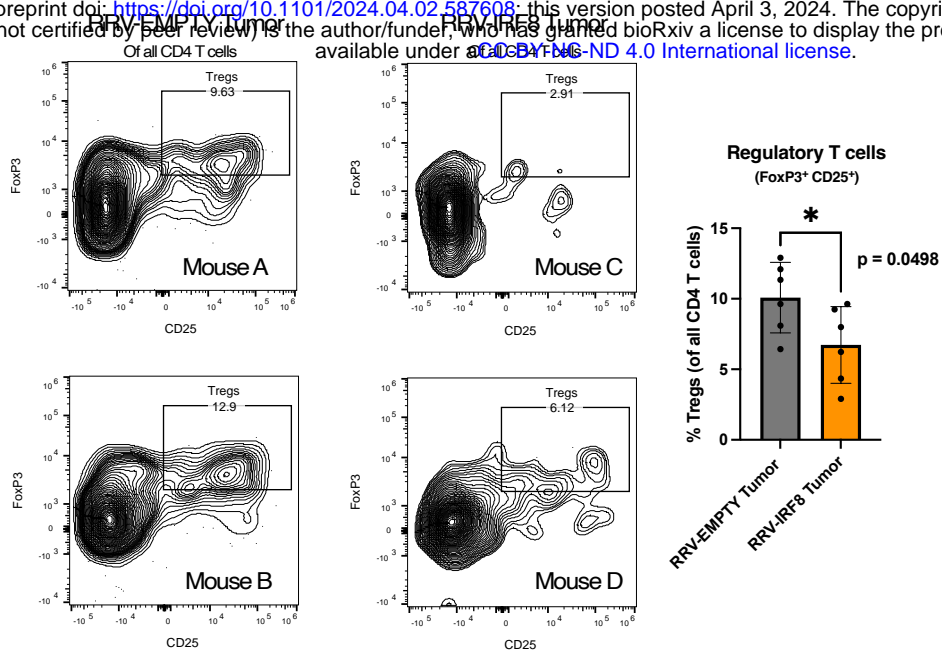

**B**

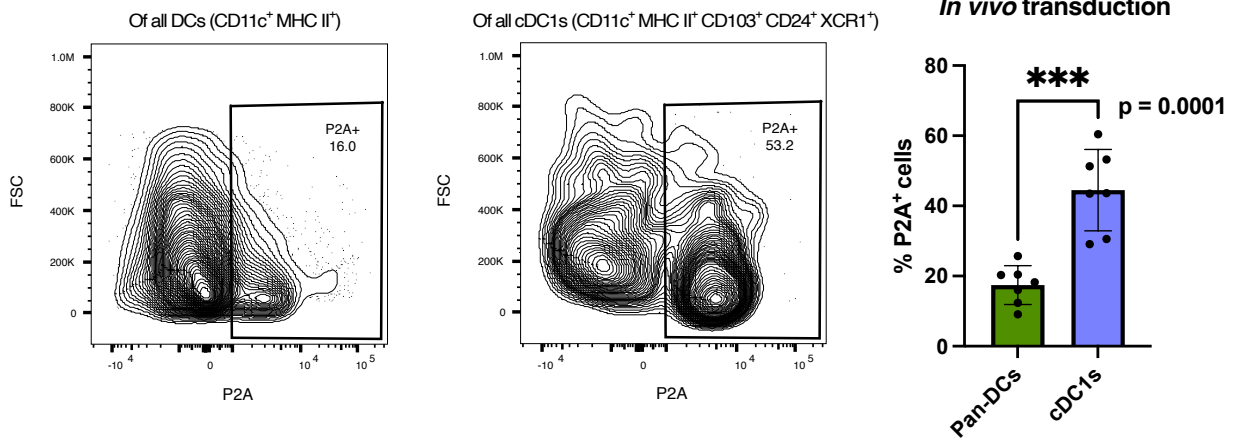

**Supplementary Figure 2. (A)** T regulatory cell infiltration in SB28 RRV-EMPTY or RRV-IRF8 tumors. Bars represent the mean of 6 biological replicates. **(B)** *In vivo* transduction efficiency of pan-DCs (CD11c<sup>+</sup> MHC II<sup>+</sup>) or cDC1s (CD11c<sup>+</sup> MHC II<sup>+</sup> CD103<sup>+</sup> CD24<sup>+</sup> XCR1<sup>+</sup>). Bars represent the mean of 7 biological replicates.

# SUPPLEMENTARY FIGURE 3

## A

bioRxiv preprint doi: <https://doi.org/10.1101/2024.04.02.587608>; this version posted April 3, 2024. The copyright holder for this preprint (which was not certified by peer review) is the author/funder, who has granted bioRxiv a license to display the preprint in perpetuity. It is made available under aCC-BY-NC-ND 4.0 International license.

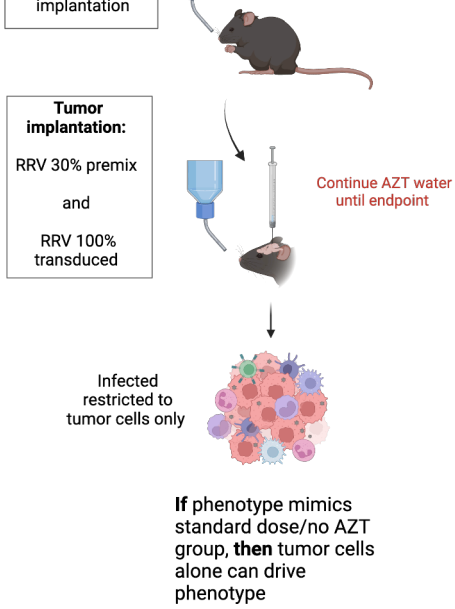

## B

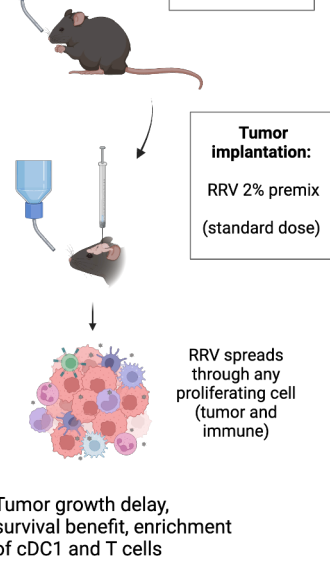

| Group Comparison                 | P value      |
|----------------------------------|--------------|
| RRV-IRF8 2% vs. RRV-IRF8 100%    | 0.0005 ***   |
| RRV-IRF8 2% vs. RRV-IRF8 30%     | <0.0001 **** |
| RRV-IRF8 30% vs. RRV-IRF8 100%   | 0.0112 *     |
| RRV-IRF8 2% vs. RRV-EMPTY 2%     | <0.0001 **** |
| RRV-IRF8 30% vs. RRV-EMPTY 30%   | 0.0003 ***   |
| RRV-IRF8 100% vs. RRV-EMPTY 100% | <0.0001 **** |

## C

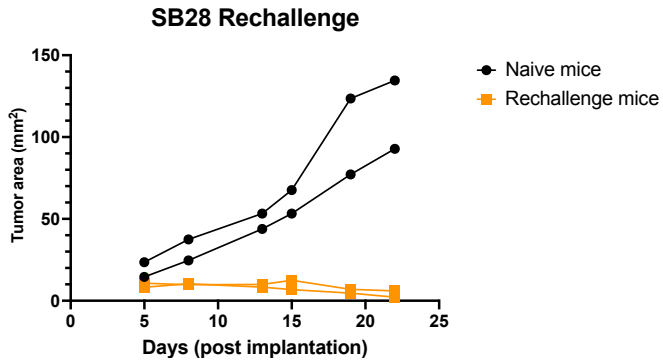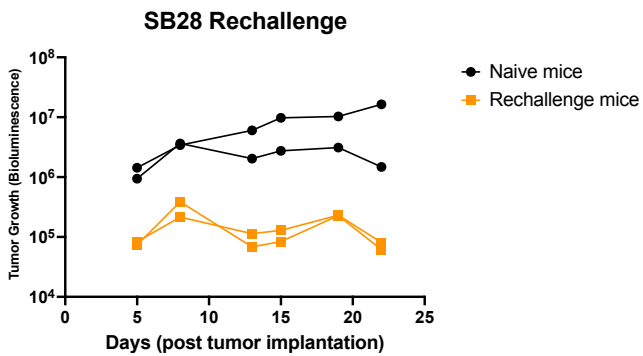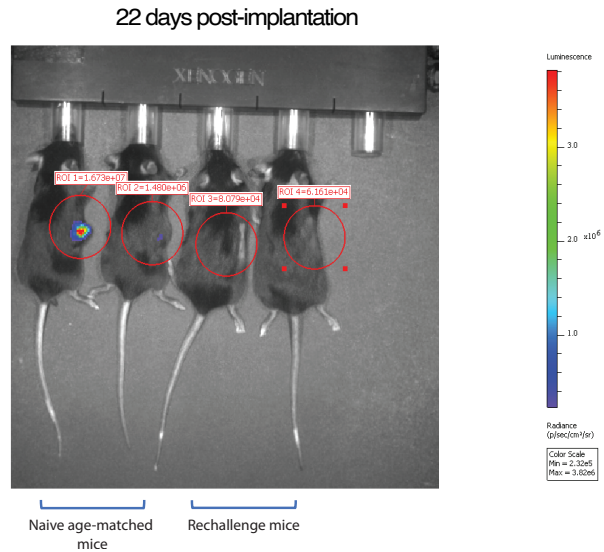

**Supplementary Figure 3. (A)** Experimental schema for the data set presented in Fig. 5. **(B)** Group comparison statistics for Fig. 5e. **(C)** Long-term survivors from Fig. 5b-c were rechallenged with  $4 \times 10^5$  SB28 WT cells in the right flank on day 65 post-intracerebral tumor inoculation. Graphs represent tumor area ( $\text{mm}^2$ ) and tumor growth bioluminescence until day 22 post-tumor inoculation.

**Supplementary Table 1: Antibodies used in flow cytometry**

| Antigen            | Clone       | Fluorophore   | Manufacturer      | Item #        |
|--------------------|-------------|---------------|-------------------|---------------|
| F480               | BM8         | BV605         | Biologend         | 123133        |
| XCR1               | ZET         | BV650         | Biologend         | 148220        |
| Ly6G               | 1A8         | BV711         | Biologend         | 127643        |
| MHC II             | M5/114.15.2 | BV785         | Biologend         | 107645        |
| CD8a               | S18018E     | FITC          | Biologend         | 162313        |
| CD11b              | M1/70       | PerCPCy5.5    | Biologend         | 101228        |
| IRF8               | V3GYWCH     | PE            | Invitrogen        | 12-9852-82    |
| CD3                | 17A2        | PE Dazzle 594 | Biologend         | 100246        |
| CD11c              | N418        | PE Cy7        | Biologend         | 117318        |
| CD45               | 30-F11      | AF700         | Biologend         | 103128        |
| Ly6C               | HK1.4       | APC Cy7       | Biologend         | 128026        |
| IDO                | 2E2/IDO1    | AF647         | Biologend         | 654003        |
| Arg1               | A1exF5      | PE Cy7        | Invitrogen        | 25-3697-82    |
| CD4                | GK1.5       | APC           | Biologend         | 100411        |
| CD103              | 2 E7        | FITC          | Biologend         | 121419        |
| CD24               | M1/69       | BV421         | Biologend         | 101825        |
| P2A                | 3H4         | APC           | Novus Biologicals | NBP2-59627APC |
| CD25               | 3C7         | PE Cy7        | Biologend         | 101915        |
| FOXP3              | MF-14       | BV421         | Biologend         | 126419        |
| Ki67               | SoIA15      | PE            | Invitrogen        | 12-5698-82    |
| Cyclin A           | E23.1       | PE            | Biologend         | 644003        |
| PCNA               | PC10        | AF647         | Biologend         | 307912        |
| Phospho-Histone H3 | 11D8        | AF488         | Biologend         | 650803        |
| Human CD45         | HI30        | AF700         | Biologend         | 304023        |
| Human Ki67         | Ki-67       | BV711         | Biologend         | 350515        |

**Supplementary Table 2: Differentially expressed T cell pathway genes**

| Probe Label  | Log2 fold change | std error (log2) | P-value  | BY.p.value |
|--------------|------------------|------------------|----------|------------|
| Cd3g-mRNA    | 6.26             | 0.65             | 2.23E-06 | 0.00172    |
| Ctla4-mRNA   | 5.53             | 0.597            | 3.21E-06 | 0.00206    |
| Icos-mRNA    | 4.43             | 0.524            | 7.24E-06 | 0.00272    |
| Il12rb1-mRNA | 3.48             | 0.418            | 8.30E-06 | 0.00272    |
| Cd3e-mRNA    | 5.48             | 0.66             | 8.48E-06 | 0.00272    |

|               |       |       |          |         |
|---------------|-------|-------|----------|---------|
| Gzmb-mRNA     | 5.64  | 0.691 | 9.93E-06 | 0.00283 |
| Cd3d-mRNA     | 4.7   | 0.579 | 1.03E-05 | 0.00283 |
| Ccl5-mRNA     | 2.91  | 0.365 | 1.23E-05 | 0.00292 |
| Zap70-mRNA    | 3.77  | 0.477 | 1.31E-05 | 0.00292 |
| Pdcd1-mRNA    | 4.54  | 0.577 | 1.37E-05 | 0.00292 |
| Lck-mRNA      | 4.15  | 0.55  | 1.96E-05 | 0.00378 |
| Socs1-mRNA    | 1.29  | 0.183 | 3.42E-05 | 0.00599 |
| Irf1-mRNA     | 1.12  | 0.161 | 3.82E-05 | 0.006   |
| Il2ra-mRNA    | 2.99  | 0.438 | 4.52E-05 | 0.006   |
| Tap1-mRNA     | 1.93  | 0.287 | 5.28E-05 | 0.00677 |
| H2-K1-mRNA    | 1.62  | 0.244 | 5.85E-05 | 0.00704 |
| H2-T23-mRNA   | 1.69  | 0.257 | 6.29E-05 | 0.00734 |
| Cd74-mRNA     | 3.18  | 0.495 | 7.60E-05 | 0.00861 |
| Il7r-mRNA     | 1.68  | 0.263 | 8.02E-05 | 0.00883 |
| Fas-mRNA      | 1.23  | 0.197 | 9.31E-05 | 0.00969 |
| Stat1-mRNA    | 1.81  | 0.301 | 0.00013  | 0.0125  |
| H2-Aa-mRNA    | 2.99  | 0.501 | 0.000136 | 0.0128  |
| H2-Ab1-mRNA   | 3.09  | 0.519 | 0.00014  | 0.0129  |
| Cd247-mRNA    | 2.62  | 0.444 | 0.000149 | 0.0133  |
| H2-D1-mRNA    | 1.24  | 0.21  | 0.000152 | 0.0133  |
| Itgal-mRNA    | 1.65  | 0.295 | 0.00023  | 0.0188  |
| Tnfsf13b-mRNA | 2.34  | 0.422 | 0.000245 | 0.0197  |
| Cd274-mRNA    | 1.49  | 0.277 | 0.000303 | 0.0233  |
| Tnfrsf14-mRNA | 1.58  | 0.302 | 0.000382 | 0.0283  |
| Itgax-mRNA    | 1.2   | 0.23  | 0.000398 | 0.0284  |
| Fcgr4-mRNA    | 1.69  | 0.33  | 0.000453 | 0.0306  |
| Tigit-mRNA    | 1.82  | 0.359 | 0.000497 | 0.0322  |
| Ccl19-mRNA    | 1.95  | 0.39  | 0.000546 | 0.0336  |
| Cd40-mRNA     | 1.76  | 0.366 | 0.000718 | 0.0401  |
| Flt3-mRNA     | 1.36  | 0.287 | 0.000801 | 0.0434  |
| H2-DMa-mRNA   | 1.75  | 0.374 | 0.000851 | 0.0445  |
| Jak2-mRNA     | 0.656 | 0.142 | 0.000935 | 0.0453  |
| Ikzf2-mRNA    | 0.587 | 0.127 | 0.00094  | 0.0453  |
| Il2rg-mRNA    | 1.31  | 0.293 | 0.0012   | 0.0549  |
| Cd4-mRNA      | 2.23  | 0.511 | 0.0014   | 0.0635  |



|             |       |       |         |        |
|-------------|-------|-------|---------|--------|
| Thy1-mRNA   | 0.663 | 0.152 | 0.00142 | 0.0635 |
| H2-M3-mRNA  | 1.06  | 0.249 | 0.00172 | 0.0734 |
| Psmb10-mRNA | 0.992 | 0.234 | 0.00173 | 0.0734 |
| Spn-mRNA    | 2.73  | 0.646 | 0.00177 | 0.074  |
| Ptprc-mRNA  | 1.11  | 0.268 | 0.002   | 0.0795 |
| Irf8-mRNA   | 1.04  | 0.251 | 0.00207 | 0.0799 |
| Stat5b-mRNA | 0.507 | 0.127 | 0.00251 | 0.0917 |
| Xcl1-mRNA   | 2.63  | 0.673 | 0.00296 | 0.105  |
| Socs3-mRNA  | 0.633 | 0.171 | 0.00405 | 0.137  |

**Supplementary Table 3: Differentially expressed DC functions pathway genes**

| Probe Label | Log2 fold change | std error (log2) | P-value  | BY.p.value |
|-------------|------------------|------------------|----------|------------|
| Ccl5-mRNA   | 2.91             | 0.365            | 1.23E-05 | 0.00292    |
| Ccl19-mRNA  | 1.95             | 0.39             | 0.000546 | 0.0336     |
| Cd40-mRNA   | 1.76             | 0.366            | 0.000718 | 0.0401     |
| Ccr5-mRNA   | 1.27             | 0.356            | 0.00512  | 0.162      |
| Cd86-mRNA   | 0.842            | 0.259            | 0.00868  | 0.237      |
| Cxcr4-mRNA  | 0.695            | 0.237            | 0.015    | 0.333      |
| Ccr1-mRNA   | 0.639            | 0.304            | 0.0622   | 0.881      |

**Supplementary Table 4: Differentially expressed MHC pathway genes**

| Probe Label  | Log2 fold change | std error (log2) | P-value  | BY.p.value |
|--------------|------------------|------------------|----------|------------|
| Nlrc5-mRNA   | 1.88             | 0.263            | 3.16E-05 | 0.0058     |
| Tap1-mRNA    | 1.93             | 0.287            | 5.28E-05 | 0.00677    |
| H2-K1-mRNA   | 1.62             | 0.244            | 5.85E-05 | 0.00704    |
| H2-T23-mRNA  | 1.69             | 0.257            | 6.29E-05 | 0.00734    |
| Cd74-mRNA    | 3.18             | 0.495            | 7.60E-05 | 0.00861    |
| H2-Aa-mRNA   | 2.99             | 0.501            | 0.000136 | 0.0128     |
| H2-Ab1-mRNA  | 3.09             | 0.519            | 0.00014  | 0.0129     |
| H2-D1-mRNA   | 1.24             | 0.21             | 0.000152 | 0.0133     |
| H2-Eb1-mRNA  | 2.91             | 0.499            | 0.000165 | 0.0141     |
| Tap2-mRNA    | 1.41             | 0.26             | 3.00E-04 | 0.0233     |
| H2-DMb1-mRNA | 2.05             | 0.406            | 0.000504 | 0.0322     |
| Klrk1-mRNA   | 2.63             | 0.522            | 0.00051  | 0.0322     |
| H2-DMa-mRNA  | 1.75             | 0.374            | 0.000851 | 0.0445     |

|            |       |       |         |        |
|------------|-------|-------|---------|--------|
| Tapbp-mRNA | 0.897 | 0.208 | 0.00154 | 0.0666 |
| H2-M3-mRNA | 1.06  | 0.249 | 0.00172 | 0.0734 |

## **Supplementary Materials and Methods**

### ***Calcium phosphate transfection***

293T cells were plated on Poly-L-Lysine coated dishes one day prior to transfection. ddH<sub>2</sub>O, plasmid DNA and 2.5 M CaCl<sub>2</sub> were mixed and added dropwise to 2X HBS (pH 7.12), while gently vortexing. The resulting DNA/CaPO<sub>4</sub> solution was added dropwise to cells and swirled gently. The following morning, media was replaced and supplemented with 20mM HEPES and 10mM Sodium Butyrate. 5-6 hours later, the media was replaced and supplemented with 10mM HEPES. The following day, the viral supernatant media was collected and filtered through 0.45 µm syringe filter, aliquoted, and frozen at -80C.

### ***Media preparation***

Complete RPMI (cRPMI) media was used for all cell culture: RPMI media with 10% FBS, 1% Sodium Pyruvate (final conc. 1mM), 1X MEM NEAA, 1X Glutamax, 1% HEPES (final conc. 0.01M), 1% Pen-Strep, and 0.1% Betamercaptoethanol.

### ***Flow cytometry***

Single-cell suspensions (0.5-1x10<sup>6</sup> cells/sample) of dissociated SB28 tumors were incubated with anti-CD16/CD32 Fc block (BioLegend, 156603) for 10 min, followed by viability staining (BioLegend, 423101) in PBS for 15 min. After washing, a cocktail of fluorophore-conjugated antibodies and monocyte blocker (BioLegend, 426101) was added to cells in a total volume of 100µL staining buffer (1X PBS, 0.5% BSA, 2mM EDTA) and incubated in the dark at 4°C for 30 min, rocking. For intracellular staining (cytosolic and nuclear), cells were subsequently fixed and permeabilized following the

manufacturer's protocol (FoxP3/Transcription Factor Staining Buffer Set, Invitrogen, 00-5523-00). Fluorophore-conjugated intracellular antibodies were added and incubated in the dark for at least 30 min, rocking. Samples were washed twice and suspended in 100 $\mu$ L staining buffer. All flow cytometry experiments were performed on the Invitrogen Attune NxT (Thermo Fisher Scientific) flow cytometer and analyzed using FlowJo software (FLOWJO, LLC, Ashland, OR, USA). All antibodies used are listed in Supp. Table 1.

### ***Orthotopic glioma model***

Under anesthesia, mice received stereotactic tumor inoculation with  $1 \times 10^4$  cells in 2  $\mu$ L HBSS (for SB28 OVA model:  $2 \times 10^4$  cells in 2  $\mu$ L HBSS) at the following coordinates relative to bregma: mediolateral 2mm, dorsoventral -3mm. Mice were monitored daily and given post-operative care, per the approved IACUC protocol. Tumor growth was measured using bioluminescent imaging twice weekly: 3mg (100 $\mu$ L) D-Luciferin was injected intraperitoneally 10 minutes prior to image acquisition.

### ***Preparation of SB28-premixed cells for intracerebral injection***

For each premixed cell solution, two sets of cells were prepared, SB28 WT and SB28-RRV (EMPTY or IRF8). For RRV-transduced cells, previously frozen RRV stocks were added to low-passage SB28 WT cells and allowed to spread until 100% of cells were transduced. Transduction was measured using flow cytometry staining for P2A and/or IRF8. For intracerebral implantation, SB28 WT and SB28-RRV (EMPTY or IRF8) were counted and mixed at 98% SB28 WT and 2% SB28-RRV in cold HBSS.

### ***Isolation of tumor-infiltrating cells***

Tumor-bearing brain quadrant was dissected and manually dissociated into ~1mm<sup>3</sup> pieces. Tumor pieces were resuspended in 0.6-1 mL collagenase buffer (3.2 mg/ml Collagenase IV, 1 mg/ml Deoxyribonuclease I in PBS) and left shaking at 700 RPM at 37°C for 45 min, pausing to mix thoroughly every 15 min. Resulting dissociated tumor suspensions were filtered through a 70 µm cell strainer and washed with excess PBS; red blood cells were lysed (Lonza, BP10-548E), and cell suspensions were stored at -80°C in Bambanker (Bulldog Bio, BB01) or stained immediately for flow cytometry. Both human and mouse GBM tumors were prepared as above.

### ***3'-Azido-3'-deoxythymidine (AZT) administration via drinking water***

0.4 mg/mL AZT (Sigma, A2169) and 2% sucrose (Thermofisher, J65148.36) were dissolved in water and provided *ad lib* in a water bottle protected from light. As vehicle control, 2% sucrose only was used; fresh solutions were prepared weekly. To monitor water consumption, water bottles were weighed daily. Mice in the AZT/sucrose groups consumed water at the same rate as those in the control, sucrose-only groups.

### ***Immunosuppression: Myeloid cell/T-cell co-culture***

**T-cells:** T-cells were isolated from spleens of naïve non-tumor bearing C57BL/6J mice using a CD3 bead isolation kit (BioLegend, 480023). T-cells were resuspended in 0.5 mM CFSE dye (CellTrace CFSE Cell Proliferation Kit, Thermofisher, C34570) in PBS and incubated in the dark for 10 minutes. Cells were washed several times to remove any unbound CFSE dye and were resuspended in growth medium containing with

CD3/CD28 activating beads (Gibco, 11161D) and supplemented with 50 IU/mL hIL-2.

**Myeloid cells:** SB28 tumors were dissociated into single cells, as described above.

Myeloid cells were isolated using a CD11b bead isolation kit (BioLegend, 480109) and resuspended in cRPMI. **Co-culture:** Myeloid cells and T-cells were combined at an effector: target ratio of 0.8:1. Cells were co-cultured in cRPMI for 4.5 days and stained for flow cytometry.

***Antigen presentation: DC/CD8 T-cell co-culture***

**T-cells:** T-cells were isolated from spleens of OT-1 transgenic (Jackson Laboratory, strain 003831) naïve non-tumor bearing mice using a CD8 bead isolation kit (BioLegend, 480007) and stained with CFSE dye (as above). Positive control T-cells were activated with CD3/CD28 beads, all T-cells were supplemented with 50 IU/mL

**DCs:** DCs were isolated from both tumors and lymph nodes. SB28 OVA RRV-EMPTY or RRV-IRF8 tumors were dissociated into single cells as described above. Cervical lymph nodes (cLNs) from the same tumor-bearing mice were incubated with collagenase buffer for 15 min at 37C, then mechanically dissociated through a 70 µm filter to generate a single cell suspension. DCs were isolated using a CD11c bead isolation kit (Milentyi, 130-100-875). **Co-culture:**  $5 \times 10^3$  DCs were combined with  $1 \times 10^5$  OT-1 T-cells in cRPMI a 96-well plate, incubated for 4 days, and stained for flow cytometry.
